# Supplementary material
Source: PubMed Central journal article supplement (PMC3949501)
Supplement: Supp_Figure1.pdf [file Supp_Figure1.pdf]

## Supplementary Data

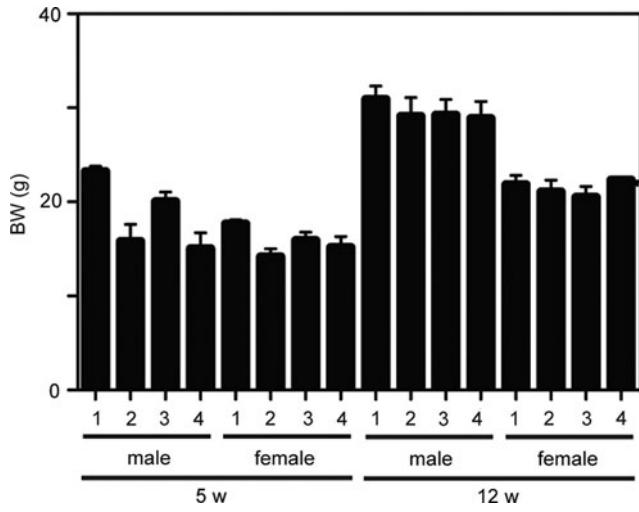

**SUPPLEMENTARY FIG. S1.** Body weights of the mice at 5 and 12 weeks. Each bar indicates mean and SEM of body weights of all mice in indicated group.
